# **Cash Transfer Programs and HIV-Related Outcomes: an Analysis of 42 Countries from 1996 to 2019**

Aaron RICHTERMAN MD,<sup>1</sup> Harsha THIRUMURTHY PhD<sup>2</sup>

**Running Title: Cash Transfers and HIV-Related Outcomes**

**Keywords:** HIV, Cash Transfers, Poverty Reduction, Social Protection

**Abbreviations:** CCT, Conditional cash transfer; CI, Confidence Interval; DHS, Demographic and Health Survey; IRR, incidence rate ratio; LMIC, low- and middle-income countries; OR, odds ratio; PEPFAR, President's Emergency Plan for AIDS Relief; UCT, unconditional cash transfer; UNAIDS, The Joint United Nations Programme on HIV/AIDS

**Word count: 4,699**  
**Number of references: 48**  
**Number of tables: 2**  
**Number of figures: 4**

*Corresponding Author:* Aaron Richterman, MD, MPH; Hospital of the University of Pennsylvania, 3400 Spruce Street, Philadelphia, PA 19104; e-mail: [aaron.richterman@pennmedicine.upenn.edu](mailto:aaron.richterman@pennmedicine.upenn.edu) telephone: 2674417915

<sup>1</sup> Division of Infectious Diseases, Hospital of the University of Pennsylvania, Philadelphia, PA, USA

<sup>2</sup> Department of Medical Ethics and Health Policy, University of Pennsylvania, Philadelphia, PA

## 1    **Abstract**

### 2    *Background*

3    Many low- and middle-income countries have introduced cash transfer programs as part of their  
4    poverty reduction and social protection strategies. These programs have the potential to  
5    overcome various drivers of HIV risk behaviors and usage of HIV services, but their overall  
6    effects on a broad range of HIV-related outcomes remains unknown.

### 7    *Methods*

8    We used publicly reported data to determine whether low- and middle-income countries with  
9    HIV prevalence >1% and baseline annual incidence >1/1000 had conditional or unconditional  
10    cash transfer programs that covered >5% of the impoverished population, and the year in which  
11    those programs began and ended. We obtained country- and individual-level data on HIV-related  
12    outcomes from UNAIDS and population-representative household surveys, focusing on the  
13    period between 1996 and 2019. We conducted difference-in-differences analyses with country  
14    and year fixed effects to evaluate the effects of cash transfer programs on country- and  
15    individual-level HIV-related outcomes.

### 16    *Findings*

17    Forty-two countries across three continents were included. Among these, 21 were in the  
18    intervention group, having implemented cash program(s) with impoverished population coverage  
19    greater than 5% during the study period. Cash transfer programs were associated with lower  
20    probability of reporting sexually transmitted infection within the last 12 months among females  
21    (odds ratio [OR] 0.67, 95% confidence interval [CI] 0.50-0.91) and higher probability of an HIV

test within the last 12 months among females (OR 2.61, 95% CI 1.15-5.88) and males (OR 3.19, 95% CI 2.45-4.15). For country-level outcomes, cash transfer programs were associated with a reduction in new HIV infections (incidence rate ratio [IRR] 0.94, 95% CI 0.89-0.99), but not with the proportion of people with HIV receiving antiretroviral therapy (5.0%, 95% CI -0.2-10.1) or AIDS-related deaths (IRR 0.99, 95% CI 0.95-1.03), though temporal analyses showed delayed improvements in both antiretroviral coverage and deaths.

### *Interpretations*

Cash transfer programs, which are being expanded in the context of the COVID-19 pandemic, have the potential to promote ongoing efforts to end HIV as a public health threat. Alongside the already existing focus on expanding biomedical services, these anti-poverty programs can play a greater role in achieving global targets for HIV prevention and treatment.

### *Funding*

None

## Introduction

HIV continues to be a major global public health threat, causing an estimated 1.7 million new infections and 690,000 AIDS-related deaths in 2019.<sup>1</sup> The Joint United Nations Programme on HIV/AIDS (UNAIDS) Fast Track plan set the goal in 2014 of reducing annual infections to 200,000 and AIDS-related deaths by 90% by 2030.<sup>2</sup> In addition to the rapid scaling up of clinical services, the Fast Track plan also emphasizes the importance of expanding social protection for achieving these objectives.<sup>3</sup> Social protection is thought to be important because of the well-documented relationship between poverty or economic inequality and risk factors for HIV transmission (e.g., transactional sex among adolescent girls and young women, earlier age at sexual debut, lower use of HIV services, and worse antiretroviral adherence) and HIV-related morbidity and mortality.<sup>4-12</sup>

Over the past two decades, many low- and middle-income countries (LMICs) have introduced cash transfer programs as central components of their poverty reduction and social protection strategies. These programs, which range from conditional cash transfer (CCT) programs that are common in Latin America to unconditional cash transfer (UCT) programs that are common in sub-Saharan Africa, exist in over 100 LMICs, and many countries have expanded or introduced new programs during the COVID-19 pandemic. A growing evidence base suggests that cash transfer programs reduce poverty, foster economic autonomy, raise school attendance for children, improve empowerment for women, and increase health service use, among other benefits.<sup>13</sup> Conceptually, cash transfer programs may improve outcomes by increasing income and addressing economic barriers as well as by alleviating the psychological impacts of poverty on mental bandwidth and decision-making.<sup>14-19</sup>

Despite the existence of cash transfer programs in many countries with generalized HIV epidemics and the large number of evaluations of these programs, relatively few studies have examined their effects on HIV-related outcomes at the individual or population level. Several studies of predominantly smaller-scale cash transfer interventions have examined the direct effects on beneficiaries and shown mixed but generally favorable changes in HIV-related outcomes. For HIV prevention, a few randomized controlled trials of cash transfers have focused on adolescent girls and young women. In Malawi, a cash transfer intervention for schooling reduced HIV prevalence among schoolgirls.<sup>20</sup> In South Africa, conditional cash transfers for schooling had no effect on HIV incidence among adolescent girls and young women, although the control group in this study received cash transfers and school attendance was high in both study groups.<sup>21</sup> No randomized controlled trials have studied the impact of unconditional cash transfer programs, which are more commonly used by governments in sub-Saharan Africa, on HIV incidence. Non-experimental impact evaluations of the Kenyan government's cash transfer program for caregivers of orphans and vulnerable children and another of the Malawi government's household cash transfer program found delays in sexual debut.<sup>22,23</sup> Finally, a much larger literature has examined the effects of financial and non-financial incentives that are tailored to specific HIV-related behaviors, but the incentive amounts are typically much smaller than the size of cash transfers typically administered in LMICs. The typical magnitude of these differences can be illustrated in Tanzania, where financial incentives conditional on HIV clinic attendance were studied for six months in 2018 with a maximum total transfer of about 2% of Gross Domestic Product (GDP) per capita, versus the national Productive Social Safety Net Programme, which provides about 12% of GDP per capita annually to poor households.<sup>24,25</sup> Studies of incentives have had mixed results, as some have demonstrated improvements in HIV

testing uptake,<sup>26-29</sup> retention in care,<sup>25,30,31</sup> adherence to antiretroviral therapy,<sup>31-33</sup> and virologic suppression,<sup>25,34</sup> while others have not.<sup>30,35-37</sup> An evaluation of large-scale cash transfer programs using cross population-level data from many different countries remains an important gap in the literature. An advantage of using population-level data when evaluating cash transfer programs (rather than using data from cash transfer beneficiaries alone) is that it will be possible to detect spillover effects of cash transfers, especially if the transfers influence health behaviors that affect the risk of HIV acquisition and transmission.

We hypothesized that larger, more generalized cash transfer programs might improve both population and individual HIV-related outcomes. While national cash transfer programs in sub-Saharan Africa are more commonly unconditional and less HIV-specific than those considered in the studies described above, benefits may still be seen because of their more expansive reach and spillover effects stemming from reduced HIV transmission. These national cash transfer programs also tend to persist over time, compared to financial incentive or cash transfer studies in which interventions have tended to be time limited.

However, few studies have evaluated the broader effects of large-scale cash transfer programs, a policy-relevant topic given the burden of HIV and growing reliance on cash transfer programs. To address this unanswered question, we conducted a difference-in-differences analysis evaluating the effects of cash transfer programs on country- and individual-level outcomes in 42 countries with generalized HIV epidemics from 1996 to 2019.

## Methods

We included all countries with HIV incidence greater than 1 per 1000 persons in 1996 and HIV prevalence greater than 1% in at least one year between 1996 and 2019,<sup>1</sup> a period when many countries introduced cash transfer programs.

### *Data*

We identified all major cash transfer programs within included countries. We manually searched a variety of sources, detailed in the Supplementary Appendix, to identify the programs and determine the year in which they were introduced, target population, whether they were conditional or unconditional, amount of transfer, and the most recently available number of beneficiaries. For each cash transfer program, we estimated the most recent impoverished population coverage by dividing the total number of beneficiaries by the number of people living below the international poverty line (Supplementary Appendix).

For individual-level data on HIV outcomes, we used the Demographic and Health Surveys (DHS), which are nationally representative cross-sectional household surveys conducted every 5 years in many LMICs (Supplementary Appendix). Information was obtained for household and individual characteristics for all female household members of reproductive age (15-49 years) and a subset of males of reproductive age (typically 15-49, 54, or 59 years). We also used AIDS Indicator Surveys (AIS), which are similar household surveys focused on HIV knowledge, attitudes, behavior, and prevalence. We used DHS or AIS data from any country that met eligibility criteria and any year between 1996 and 2019.

For country-level HIV statistics, we relied on UNAIDS annual estimates that are generated with modeling techniques based on representative population-based surveys and surveillance studies.<sup>1</sup>

We obtained country and year UNAIDS estimates for the number of new HIV infections, the

number of AIDS-related deaths, and proportion of people with HIV receiving antiretroviral therapy.

We obtained additional time-varying covariates for each country and year that were likely to be associated with changes in cash transfer programs and HIV outcomes: Gross Domestic Product (GDP) per capita,<sup>38</sup> President's Emergency Plan for AIDS Relief (PEPFAR) funding budgeted per capita,<sup>39</sup> The Global Fund to Fight AIDS, Tuberculosis and Malaria disbursements for HIV-related programs per capita,<sup>40</sup> and six Worldwide Governance Indicators from The World Bank that are composite indicators based on 30 data sources: Voice and Accountability, Political Stability and Absence of Violence, Government Effectiveness, Regulatory Quality, Rule of Law, and Control of Corruption.<sup>38</sup>

### *Statistical Analysis*

We performed difference-in-differences analyses using multivariable regression models to compare trends in HIV-related outcomes in countries with cash transfer programs to those in the same countries prior to cash transfer program introduction and to those in comparison countries without cash transfer programs. Our analysis was developed based on a proposed causal framework linking cash transfer programs to HIV-related outcomes, mediated through an effect on poverty (Figure 1). Our primary explanatory variable of interest was a binary variable indicating presence in a given year of a cash transfer program (or combination of programs) for which the number of beneficiaries exceeded 5% of the population living below the poverty line (Supplementary Appendix).<sup>38</sup> Our choice of 5% impoverished population coverage as the threshold for our intervention group was subjective but chosen empirically as the smallest likely coverage with which we might expect to see population effects.



We examined the association between cash transfer programs and both individual- and country-level outcomes. For individual-level outcomes, the unit of observation was a surveyed person in a given country during a given year, and we stratified individual-level outcomes by sex. Individual-level outcomes included the continuous variable age at sexual debut among youths and the binary variables sexually transmitted infection within the prior 12 months, greater than one sexual partner within the prior 12 months, HIV test within the prior 12 months, transactional sex within the prior 12 months, and condom use during the last sexual encounter. The transactional sex outcome was only analyzed for males because this question was only recently added to the female questionnaire in the DHS and there were not enough observations for meaningful comparisons.

For country-level outcomes, the unit of observation was the country-year. Country-level outcomes included the number of new HIV infections, the number of AIDS-related deaths, and the proportion of people with HIV receiving antiretroviral therapy.

We estimated linear regression models for continuous outcomes, logistic regression models for binary outcomes, and negative binomial regression models for outcomes aggregated as counts. We included fixed effects for each country, which adjusted for measured and unmeasured time-invariant differences between countries, and for each year, which controlled for secular trends in the outcomes across all countries. We used robust standard errors clustered at the country level. For all outcomes, we included additional time-varying, country-level covariates of GDP per capita, PEPFAR funding per capita, HIV-related disbursements by The Global Fund per capita, and three World Bank Worldwide Governance Indicators (Control of Corruption, Political Stability and Absence of Violence, and Voice and Accountability). The other three World Bank Worldwide Governance Indicators (Government Effectiveness, Regulatory Quality, and Rule of

Law) were not included because of collinearity (Supplementary Appendix). For individual-level outcomes, we included additional covariates – age, single marital status, education, wealth quintile, and rural/urban household setting – and used survey commands to apply sampling probability weights.

We performed several secondary and sensitivity analyses to better characterize the association between cash transfer programs and HIV-related outcomes. First, because country-level outcomes were available annually, we evaluated the temporal relationship between cash transfer programs and country-level outcomes by creating a series of binary indicators for each year after the cash transfer period began. Second, we explored whether there were interactions between cash transfer programs and having above-median HIV prevalence ( $>3.7\%$ ) at the start of the cash transfer program. Third, we did a similar interaction analysis based on whether a country's cash transfer program had above-median coverage ( $>23\%$  of the population living below the poverty line). Fourth, we stratified models for individual-level outcomes by wealth quintile. Fifth, while our models controlled for PEPFAR and Global Fund spending, to further ensure there was no major collinearity contributing to our findings we used PEPFAR funding per capita and HIV-related Global Fund disbursements per capita as outcomes in our primary models to assess for correlation with cash transfer programs. Sixth, we assessed whether individual countries might be outliers for key outcomes by assessing whether estimates changed substantially after excluding each individually.

The difference-in-differences design is quasi-experimental and relies on the parallel trends assumption, which is that in the absence of the implementation of cash transfer programs, trends in outcomes would be similar in the intervention and comparison countries. We tested whether intervention and comparison countries had similar trends in the pre-cash transfer period by

estimating regression models using only data prior to the cash transfer period in each country and including an interaction term between an indicator of whether the country was in the intervention group and a linear time trend. We tested the parallel trends assumption for outcomes with significant findings in our primary analysis. We further evaluated pre-trends in the country-level outcomes by including binary indicators for the four years prior to the cash transfer period in the previously mentioned temporal analysis. Using a temporal analysis to visualize pre-trends for the individual-level outcomes (which were measured in survey) is more difficult because annual survey data were not available for countries. As a result, sample sizes vary greatly by year. We attempted to mitigate this issue somewhat by categorizing multiple years together to allow for greater interpretability, but temporal trends for the individual-level outcomes should be interpreted with caution.

Recent advances in difference-in-differences analyses with variation in intervention timing have shown that estimates may be biased particularly if there is heterogeneity in intervention effect over time.<sup>41,42</sup> We conducted a series of additional analyses to assess for the presence and magnitude of this potential bias,<sup>43</sup> detailed in the Supplementary Appendix.

Additional details on the regression models are available in the Supplementary Appendix. We performed statistical analysis using SAS V.9.4 and R V.3.5.2 using the ggplot2 package.

#### *Data Availability Statement*

Analyzed data can be requested from the DHS program website (<https://www.dhsprogram.com/Data/>) or are publicly available from UNAIDS (<http://aidsinfo.unaids.org/>), The World Bank (<https://data.worldbank.org/data-catalog/>),

211 PEPFAR (<https://data.pepfar.gov/financial>), and The Global Fund ([https://data-](https://data-service.theglobalfund.org/downloads)  
212 [service.theglobalfund.org/downloads](https://data-service.theglobalfund.org/downloads)).

213 *Code Availability Statement*

214 Analysis code is available upon request to the corresponding author.

215 *Role of the Funding Source*

216 None

## 217 **Results**

218 Forty-two countries were eligible for inclusion in this study — 36 (86%) in Africa, 4 (10%) in  
219 Latin America and the Caribbean, and 2 (5%) in Asia (Table 1, Supplementary Figures 1-3).  
220 Among these, 21 countries implemented an eligible cash transfer program (or combination of  
221 cash transfer programs) at some point during the study period (Figure 1). In these countries, there  
222 were 36 cash transfer programs — 28 were unconditional and eight were conditional  
223 (Supplementary Table 1). The median total coverage level for cash transfer programs in the  
224 intervention group was 23% of the impoverished population (IQR 14-63%) and the median HIV  
225 prevalence at the beginning of the cash transfer period was 3.7% (IQR 1.5-10.7%).

226 At the start of the study period, intervention countries had higher HIV prevalence (median 4.1%  
227 vs 1.7%) and annual HIV incidence rate (median 3.8 vs 2.2 per 1,000 persons) relative to  
228 comparison countries, but there was no difference between them in any of the six World Bank  
229 Governance Indicators (Table 1). All countries received some HIV-related Global Fund

disbursements during the study period, and 16 (76%) intervention countries relative to 8 (38%) control countries received PEPFAR funding at some point during the study period.

We obtained individual survey data from 99 DHS and 6 AIS conducted in included countries during the study period – 24 during intervention years and 82 during comparison years (Figure 1). There were 1,885,733 survey respondents in total, of whom 1,295,177 (69%) were female and 545,867 (29%) were interviewed during intervention years (Supplementary Tables 4-6).

In our primary individual-level analyses, among females, cash transfer programs were associated with a lower probability of having a sexually transmitted infection within the last 12 months (odds ratio [OR] 0.67, 95% confidence interval [CI] 0.50-0.91) and higher probability of having had an HIV test within the last 12 months (OR 2.61, 95% CI 1.15-5.88) (Table 2, Supplementary Tables 7-17). PEPFAR funding per capita (OR 1.14 per \$5 increase, 95% CI 1.01-1.30) and HIV-related Global Fund disbursements per capita (OR 1.48 per \$5 increase, 95% CI 1.18-1.84) were also associated with an increased probability of having had an HIV test within 12 months.

Among males, cash transfer programs were significantly associated with an increased probability of having an HIV test within the last 12 months (OR 3.19, 95% CI 2.45-4.15) (Table 2, Supplementary Tables 7-17). PEPFAR funding per capita (OR 1.22 per \$5 increase, 95% CI 1.12-1.32) and HIV-related Global Fund disbursements per capita (OR 1.22 per \$5 increase, 95% CI 1.09-1.36) were also associated with an increased probability of having an HIV test within the last 12 months.

In our primary country-level analyses, cash transfer programs were associated with a reduction in new HIV infections (incidence rate ratio [IRR] 0.94, 95% CI 0.89-0.99), but not with the proportion of people with HIV receiving antiretroviral therapy (5.0%, 95% CI -0.2-10.1) or

AIDS-related deaths (IRR 0.99, 95% CI 0.95-1.03). In the same models, PEPFAR funding per capita was associated with a reduction in AIDS-related deaths (IRR 0.98 per \$5 increase, 95% CI 0.97-0.99) and an increase in the proportion of people with HIV receiving antiretroviral therapy (2.6% per \$5 increase, 95% CI 1.7-3.5), results that are consistent with an earlier analysis of the relationship between PEPFAR and HIV outcomes.<sup>44</sup> PEPFAR funding per capita was not associated with new HIV infections (IRR 1.00 per \$5 increase, 95% CI 0.99-1.01). In addition, HIV-related Global Fund disbursements per capita were associated with an increase in the proportion of people with HIV receiving antiretroviral therapy (3.3% per \$5 increase, 95% CI 0.4-6.2), but not with new HIV infections (IRR 0.99 per \$5 increase, 95% CI 0.98-1.00) or AIDS-related deaths (IRR 0.99 per \$5 increase, 95% CI 0.98-1.01).

We next evaluated associations between cash transfer programs and country-level outcomes over time (Figure 2). In fully adjusted models, we found that new HIV infections were significantly lower in the first year of the cash transfer program (IRR 0.94, 95% CI 0.89-0.99). While the effects on new infections became larger in subsequent years after the introduction of cash transfer programs, they were less precisely estimated over time as a result of declining numbers of observations and were no longer significant after the second year of the cash transfer program. There were no significant changes in AIDS-related deaths during the first year of the cash transfer program (IRR 0.99, 95% CI 0.95-1.03), consistent with our primary analysis. However, we found significant reductions in AIDS-related deaths by the second year of the cash transfer program (IRR 0.91, 95% CI 0.83-0.99), with larger reductions over time that peaked in the ninth year of the cash transfer program (IRR 0.75, 95% CI 0.57-0.99). Similarly, there was no significant change in the proportion of people with HIV receiving antiretroviral therapy on the

first year of the cash transfer program (0.8%, 95% CI -1.0%-2.5%), but we found a significant increase by the second year (3.0%, 95% CI 0.3-5.7), with larger increases over time.

In the interaction analysis, the effects of cash transfer programs were greater in higher prevalence countries for the outcomes of an HIV test in the last 12 months among females ( $p < 0.0001$ ) and males ( $p < 0.0001$ ), and in lower prevalence countries for new HIV infections ( $p = 0.007$ ) (Figure 3, Supplementary Table 21). The effects of cash transfer programs were greater with higher coverage cash transfer programs for the outcomes of sexually transmitted infection in the last 12 months among females ( $p < 0.0001$ ), having had an HIV test in the last 12 months among females ( $p = 0.05$ ) and males ( $p < 0.0001$ ), and AIDS-related deaths ( $p = 0.01$ ).

When stratifying individual-level outcomes by wealth quintile, there were some modest trends suggesting larger effects in poorer segments of the population, though these were inconsistent and not definitively identified (Supplementary Figure 4). We confirmed that there was no significant association between the presence of cash transfer programs and either PEPFAR funding per capita or HIV-related Global Fund disbursements when these were included in our primary model as outcomes (Supplementary Tables 22-23). Exclusion of individual countries did not reveal possible outlier countries for any outcome except for HIV testing in females, for which Guinea and Zambia were potentially outliers whose exclusion substantially changed the estimated effect of cash transfers (Supplementary Tables 24-27).

Our fully adjusted models to test whether intervention and comparison countries had similar trends in outcomes before the introduction of cash transfers in a given country showed no differences between countries for the individual-level outcome of having a sexually transmitted infection in the last 12 months for females (OR 0.98, 95% CI 0.92-1.04) or males (OR 0.99, 95%

CI 0.95-1.02), or for the country-level outcome of new HIV infections (IRR 0.99, 95% CI 0.96-1.02) (Supplementary Tables 28-30). There were small, significant differences of opposite magnitude in trends in outcomes before the introduction of cash transfers for the individual-level outcome of having an HIV test within the prior 12 months for females (OR 0.81, 95% CI 0.81-0.82) and males (OR 1.27, OR 1.01-1.12) (Supplementary Tables 31-32). There were no discernible differences in outcomes between intervention and control countries in the four years prior to the cash transfer period in our temporal analysis of country-level (Figure 2) or individual-level outcomes (Supplementary Figures 5-6) except for the HIV testing outcome among males, where there was some visual evidence of differential pre-trends in cash transfer countries.

Additional analyses suggested that the effect of cash transfers was heterogeneous over time but that any resultant bias was likely small (Supplementary Appendix, Supplementary Figures 7-8, Supplementary Tables 33-34).

## Discussion

In this study of 42 countries with generalized HIV epidemics of varying magnitude across three continents from 1996 to 2019, we found that sizeable cash transfer programs were associated with important improvements in HIV-related outcomes at both the population and individual levels. These included an immediate reduction in new HIV infections and delayed improvements in both AIDS-related deaths and the proportion of people with HIV receiving antiretroviral therapy, with benefits that grew larger over time. Among individuals, we found that cash transfer programs were associated with a reduction in sexually transmitted infections (a key proxy measure for risk of HIV transmission) among females, as well as large increases in recent HIV



testing among males and females, though there were small differential pre-trends for the HIV testing outcome so this finding should be interpreted with some caution. Our interaction analyses showed that cash transfer programs with greater numbers of beneficiaries had the largest effects on HIV-related outcomes, suggesting an element of dose-response at the population level. We also found that the relationship between cash transfer programs and HIV testing was strongest in countries with higher baseline HIV prevalence, indicating the importance of the specific context of a given country's HIV epidemic. To our knowledge, this is the first study to have combined data from all countries with generalized HIV epidemics and studied the effects of large-scale cash transfer programs.

While our findings are consistent with prior evidence from randomized controlled trials of cash transfer interventions that support the use of cash transfers for the prevention of HIV,<sup>20,45-47</sup> and along the HIV care continuum,<sup>25-34</sup> there are several notable distinctions to consider when interpreting our findings. First, the cash transfer programs considered in this study were generally of larger scale and less HIV-specific than those studied in the randomized trials. Second, almost all of the cash transfer interventions studied in randomized trials were conditional on intermediary outcomes like school attendance, negative testing for sexually transmitted infections, HIV testing, or clinical follow up, whereas nearly 80% of the programs considered in our analysis were unconditional. Our study thus provides evidence, across many countries with generalized HIV epidemics, on the effects of primarily government-led cash transfer programs. Third, by evaluating outcomes for entire populations (i.e. by including individuals and households that did not receive transfers), our findings also capture the indirect or spillover effects of these interventions. These spillover effects are likely to be important in the

context of an infectious disease with transmission dynamics and clinical outcomes that are heavily influenced by structural factors like poverty and food insecurity.

There are a number of hypothesized mechanisms by which cash transfer interventions could improve HIV-related outcomes. By increasing economic well-being, empowerment among women, and educational attainment, cash transfers may lead to lower risk sexual behaviors (as evidenced in our analysis by a reduction in sexually transmitted infections), thus lowering the probability of acquiring or transmitting HIV.<sup>13</sup> This plausibly includes a reduction in transactional sex among women,<sup>48</sup> an important driver of HIV risk among adolescent girls and young women in particular for which data were unavailable to consider in our analysis.<sup>5</sup> Cash transfer programs may also lead to improvements along the HIV care continuum (i.e., HIV testing, clinic attendance, and antiretroviral adherence) through a direct economic mechanism that reduces barriers to care and a psychological mechanism that promotes health-seeking behaviors through improvements in mental bandwidth.<sup>14</sup> As a result, cash transfers may lead to increases in HIV diagnoses (as evidenced in our analysis by increased HIV testing), engagement in clinical care by people with HIV, and higher probability of receiving and adhering to antiretroviral therapy with subsequent virologic suppression (as evidenced in our analysis by a delayed increase in the proportion of people with HIV receiving antiretroviral therapy). This would both directly improve clinical outcomes for people with HIV and reduce rates of transmission because of the highly effective strategy of using HIV treatment as prevention, commonly referred to as “Undetectable = Untransmittable” or “U=U.” By supporting preventive health behaviors, anti-poverty interventions like cash transfers can thus play an important role in improving individual HIV outcomes and preventing HIV transmission by intervening proximally to current efforts for HIV control, which are focused primarily at the health system level.

While previous analyses have used a similar design to study effects of programs like PEPFAR, this study is the first to do so for a common anti-poverty program that a growing number of LMICs are introducing as central features of their poverty reduction and social protection strategies.<sup>44</sup> While not the primary objective of this study, our findings also suggest improvements in HIV testing, population antiretroviral coverage, and AIDS-related deaths related to PEPFAR and The Global Fund.

This study has several limitations. The cash transfer programs we considered were heterogeneous in terms of target population, size of transfer, conditionality, and coverage. Due to sample size limitations, we cannot precisely determine the relative importance of these other features of cash transfer programs, although in our interaction analyses we do establish that programs which covered more individuals tended to have larger effects. In particular, the relative amount of the transfer is likely to influence any effect it has on health outcomes, but because of variability of transfer size within many of the programs and inconsistent reporting we were unable to meaningfully consider this in our analysis. While the DHS and AIS surveys do not uniformly indicate whether participants received cash transfers, and thus we cannot separately determine cash transfer program effects on beneficiaries and non-beneficiaries, our objective was to evaluate the overall population-level effect of these programs, and it is plausible that the effects are larger on beneficiaries relative to non-beneficiaries. While we included country and year fixed effects and used a difference-in-differences design, the possibility of residual confounding related to unmeasured time-varying variables remains, though the robustness of our results after controlling for the available time-varying country-specific variables suggests this bias, if present, is minor. Specifically, there are country-specific policies that influence cash transfer program coverage and uptake (e.g., outreach, enrollment procedures, ease of benefit

receipt). We attempted to control for these differences by including country fixed effects and the World Bank Governance Indicators in regression models, but if these policies differed between countries over time and were also associated with changes in HIV-related outcomes this may influence our findings. Importantly, though, we were attempting to examine the effects of cash transfer programs as they are delivered in the real world and would emphasize that implementation failures would most likely bias our results towards the null. The study period we considered was one of generally substantial expansion of HIV control programs, and the relationship between cash transfer programs and HIV-related outcomes may differ in settings with already established HIV care systems.

## Conclusion

In this difference-in-differences study of 42 countries with generalized HIV epidemics from 1996 to 2019, we found that cash transfer programs were associated with an immediate reduction in new HIV infections, a delayed improvement in AIDS-related deaths and the proportion of people with HIV receiving antiretroviral therapy, a reduction in sexually transmitted infections in the last 12 months among females, and an increase in recent HIV testing among males and females. Based on our results, experimental studies that further investigate the effects of unconditional cash transfers on HIV incidence and other HIV prevention behaviors should be a priority for future research. This study also contributes to our understanding of the social determinants of health, and suggests that HIV-related benefits should be included in cost-benefit analyses of cash transfer programs. As countries expand cash transfer programs, particularly in the context of the COVID-19 pandemic, these findings suggest that anti-poverty interventions like cash transfers should receive greater attention as part of HIV control efforts, alongside the already existing focus on expanding biomedical services.

## 409 Funding

410 None

## 411 Declaration of Interests

412 The authors declare no conflicts of interest.

## 413 Author Contribution Statement

414 AR and HT conceptualized and designed the study. AR conducted the primary analysis and  
415 wrote the first draft of the manuscript, both with critical feedback from HT.

## 416 References

- 417 1. UNAIDS. UNAIDS Data 2019. <http://aidsinfo.unaids.org/> (accessed 1/11/21).
- 418 2. UNAIDS. Fast-track: ending the AIDS epidemic by 2030. *Geneva: UNAIDS* 2014.
- 419 3. UNAIDS. Social protection: a Fast-Track commitment to end AIDS. *Geneva: UNAIDS*
- 420 2018.
- 421 4. Richterman A, Leandre F, Jerome JG, Tsai AC, Ivers LC. Mortality Over Long-term Follow-
- 422 up for People With HIV Receiving Longitudinal Care and Antiretroviral Therapy in Rural Haiti.
- 423 *Open Forum Infect Dis* 2020; **7**(8): ofaa328.
- 424 5. Joint United Nations Programme on HIV/AIDS and STRIVE. Transactional sex and HIV
- 425 risk: from analysis to action. Geneva, 2018.
- 426 6. Lopman B, Lewis J, Nyamukapa C, Mushati P, Chandiwan S, Gregson S. HIV incidence
- 427 and poverty in Manicaland, Zimbabwe: is HIV becoming a disease of the poor? *AIDS (London,*
- 428 *England)* 2007; **21 Suppl 7**(Suppl 7): S57-66.
- 429 7. Brodish PH. An association between neighbourhood wealth inequality and HIV
- 430 prevalence in sub-Saharan Africa. *J Biosoc Sci* 2015; **47**(3): 311-28.
- 431 8. Gaumer G, Sherafat-Kazemzadeh R, Jordan M, Nandakumar A. Wealth and wealth
- 432 inequality in adult HIV prevalence. *J Glob Health Rep* 2021: e2020105.
- 433 9. Eaton LA, Cain DN, Pitpitan EV, et al. Exploring the relationships among food insecurity,
- 434 alcohol use, and sexual risk taking among men and women living in South African townships. *J*
- 435 *Prim Prev* 2014; **35**(4): 255-65.
- 436 10. Singer AW, Weiser SD, McCoy SI. Does Food Insecurity Undermine Adherence to
- 437 Antiretroviral Therapy? A Systematic Review. *AIDS Behav* 2015; **19**(8): 1510-26.

- 438 11. Weiser SD, Tsai AC, Gupta R, et al. Food insecurity is associated with morbidity and  
439 patterns of healthcare utilization among HIV-infected individuals in a resource-poor setting.  
440 *AIDS (London, England)* 2012; **26**(1): 67-75.
- 441 12. Aibibula W, Cox J, Hamelin A-M, McLinden T, Klein MB, Brassard P. Association Between  
442 Food Insecurity and HIV Viral Suppression: A Systematic Review and Meta-Analysis. *AIDS and*  
443 *Behavior* 2017; **21**(3): 754-65.
- 444 13. Bastagli F, Hagen-Zanker J, Harman L, Barca V. Cash transfers: what does the evidence  
445 say? London: Overseas Development Institute, 2016.
- 446 14. Mani A, Mullainathan S, Shafir E, Zhao J. Poverty Impedes Cognitive Function. *Science*  
447 *(New York, NY)* 2013; **341**(6149): 976.
- 448 15. Weiser SD, Palar K, Hatcher AM, Young S, Frongillo EA, Laraia B. Food Insecurity and  
449 Health: A Conceptual Framework. In: Ivers LC, ed. Food Insecurity and Public Health. Boca  
450 Raton, Fla, USA: CRC Press; 2015.
- 451 16. Haushofer J, Fehr E. On the psychology of poverty. *Science (New York, NY)* 2014;  
452 **344**(6186): 862.
- 453 17. Schilbach F, Schofield H, Mullainathan S. The Psychological Lives of the Poor. *Am Econ*  
454 *Rev* 2016; **106**(5): 435-40.
- 455 18. Fernald LC, Gertler PJ, Neufeld LM. Role of cash in conditional cash transfer programmes  
456 for child health, growth, and development: an analysis of Mexico's Oportunidades. *Lancet* 2008;  
457 **371**(9615): 828-37.
- 458 19. Walque D, Fernald LC, Gertler PJ, Hidrobo H. Cash Transfers and Child and Adolescent  
459 Development. In: Bundy D, de Silva N, Horton S, Jamison DT, Patton G, eds. Disease Control  
460 Priorities. Third edition ed. Washington, DC: World Bank.
- 461 20. Baird SJ, Garfein RS, McIntosh CT, Ozler B. Effect of a cash transfer programme for  
462 schooling on prevalence of HIV and herpes simplex type 2 in Malawi: a cluster randomised trial.  
463 *Lancet* 2012; **379**(9823): 1320-9.
- 464 21. Pettifor A, MacPhail C, Hughes JP, et al. The effect of a conditional cash transfer on HIV  
465 incidence in young women in rural South Africa (HPTN 068): a phase 3, randomised controlled  
466 trial. *The Lancet Global health* 2016; **4**(12): e978-e88.
- 467 22. Handa S, Halpern CT, Pettifor A, Thirumurthy H. The Government of Kenya's Cash  
468 Transfer Program Reduces the Risk of Sexual Debut among Young People Age 15-25. *PloS one*  
469 2014; **9**(1): e85473.
- 470 23. Handa S, Angeles G, Abdoulayi S, Mvula P, Tsoka M. Malawi Social Cash Transfer  
471 Program Endline Impact Evaluation Report: University of North Carolina Chapel Hill, 2016.
- 472 24. Socialprotection.org Programme Database.  
473 <https://socialprotection.org/discover/programme> (accessed 1/11/21).
- 474 25. Fahey CA, Njau PF, Katabaro E, et al. Financial incentives to promote retention in care  
475 and viral suppression in adults with HIV initiating antiretroviral therapy in Tanzania: a three-arm  
476 randomised controlled trial. *The Lancet HIV* 2020; **7**(11): e762-e71.
- 477 26. Thornton RL. The Demand for, and Impact of, Learning HIV Status. *Am Econ Rev* 2008;  
478 **98**(5): 1829-63.
- 479 27. Kohler H-P, Thornton RL. Conditional cash transfers and HIV/AIDS prevention:  
480 unconditionally promising? *The World Bank Economic Review* 2012; **26**(2): 165-90.

28. Kim HB, Haile B, Lee T. Promotion and Persistence of HIV Testing and HIV/AIDS Knowledge: Evidence From a Randomized Controlled Trial in Ethiopia. *Health Econ* 2017; **26**(11): 1394-411.
29. Kranzer K, Simms V, Bandason T, et al. Economic incentives for HIV testing by adolescents in Zimbabwe: a randomised controlled trial. *The lancet HIV* 2018; **5**(2): e79-e86.
30. Yotebieng M, Thirumurthy H, Moracco KE, et al. Conditional Cash Transfers to Increase Retention in PMTCT Care, Antiretroviral Adherence, and Postpartum Virological Suppression: A Randomized Controlled Trial. *Journal of acquired immune deficiency syndromes (1999)* 2016; **72** Suppl 2(Suppl 2): S124-S9.
31. McCoy SI, Njau PF, Fahey C, et al. Cash vs. food assistance to improve adherence to antiretroviral therapy among HIV-infected adults in Tanzania. *AIDS (London, England)* 2017; **31**(6): 815-25.
32. Emenyonu N, Muyindike W, Habyarimana J, et al. Cash transfers to cover clinic transportation costs improve adherence and retention in care in a HIV treatment program in rural Uganda. 17th conference on retroviruses and opportunistic infections; 2010; 2010. p. 16-9.
33. Linnemayr S, Stecher C, Mukasa B. Behavioral economic incentives to improve adherence to antiretroviral medication. *AIDS (London, England)* 2017; **31**(5): 719-26.
34. El-Sadr WM, Donnell D, Beauchamp G, et al. Financial Incentives for Linkage to Care and Viral Suppression Among HIV-Positive Patients: A Randomized Clinical Trial (HPTN 065). *JAMA Intern Med* 2017; **177**(8): 1083-92.
35. Thirumurthy H, Ndyabakira A, Marson K, et al. Financial incentives for achieving and maintaining viral suppression among HIV-positive adults in Uganda: a randomised controlled trial. *The lancet HIV* 2019; **6**(3): e155-e63.
36. Maughan-Brown B, Smith P, Kuo C, et al. A Conditional Economic Incentive Fails to Improve Linkage to Care and Antiretroviral Therapy Initiation Among HIV-Positive Adults in Cape Town, South Africa. *AIDS Patient Care STDS* 2018; **32**(2): 70-8.
37. Metsch LR, Feaster DJ, Gooden L, et al. Effect of Patient Navigation With or Without Financial Incentives on Viral Suppression Among Hospitalized Patients With HIV Infection and Substance Use: A Randomized Clinical Trial. *Jama* 2016; **316**(2): 156-70.
38. The World Bank. World Development Indicators. <https://data.worldbank.org/data-catalog/world-development-indicators> (accessed 1/12/21).
39. PEPFAR Panorama Spotlight: Financial Management. <https://data.pepfar.gov/financial> (accessed 2/11/21).
40. TheGlobalFund Data Service. <https://data-service.theglobalfund.org/downloads> (accessed 1/12/21).
41. Goodman-Bacon A. Difference-in-differences with variation in treatment timing. *Journal of Econometrics* 2021.
42. Callaway B, Sant'Anna PHC. Difference-in-Differences with multiple time periods. *Journal of Econometrics* 2020.
43. Jakiela P. Simple Diagnostics for Two-Way Fixed Effects. *arXiv preprint arXiv:210313229* 2021.
44. Bendavid E, Bhattacharya J. The President's Emergency Plan for AIDS Relief in Africa: an evaluation of outcomes. *Ann Intern Med* 2009; **150**(10): 688-95.

45. Björkman Nyqvist M, Corno L, De Walque D, Svensson J. Incentivizing safer sexual behavior: evidence from a lottery experiment on HIV prevention. *American Economic Journal: Applied Economics* 2018; **10**(3): 287-314.
46. Karim A, Leask K, Kharsany A, al. e. Impact of conditional cash incentives on HSV-2 and HIV prevention in rural South African high school students: results of CAPRISA 007 cluster randomized trial. International AIDS Conference. Vancouver, Canada. TUAC0101LB; 2015.
47. de Walque D, Dow WH, Nathan R, et al. Incentivising safe sex: a randomised trial of conditional cash transfers for HIV and sexually transmitted infection prevention in rural Tanzania. *BMJ Open* 2012; **2**(1): e000747.
48. Cluver L, Boyes M, Orkin M, Pantelic M, Molwena T, Sherr L. Child-focused state cash transfers and adolescent risk of HIV infection in South Africa: a propensity-score-matched case-control study. *The Lancet Global health* 2013; **1**(6): e362-70.



538 **Table 1.** Characteristics of included countries that implemented a cash transfer program (or combination of programs) with greater  
539 than 5% impoverished population coverage during the study period (1996-2019) compared to those that did not implement such  
540 program(s).

|                                                                 | <b>Intervention Countries<br/>N=21</b> | <b>Comparison Countries<br/>N=21</b> | <b>Total<br/>N=42</b> | <b>p-value</b> |
|-----------------------------------------------------------------|----------------------------------------|--------------------------------------|-----------------------|----------------|
| <b>Population (1000s), 1996, median (IQR)</b>                   | 10,372 (2,786-21,032)                  | 4,349 (1,663-7,251)                  | 11,801 (2,948-25,876) | 0.45           |
| <b>Region, N(%)</b>                                             |                                        |                                      |                       | <.0001         |
| <i>Africa</i>                                                   | 16 (76)                                | 20 (95)                              | 36 (86)               |                |
| <i>Latin America / Caribbean</i>                                | 3 (14)                                 | 1 (5)                                | 4 (10)                |                |
| <i>Asia</i>                                                     | 2 (10)                                 | 0 (0)                                | 2 (5)                 |                |
| <b>HIV Prevalence, median (IQR)</b>                             |                                        |                                      |                       |                |
| <i>1996</i>                                                     | 4.1 (2.0-12.5)                         | 1.7 (1.4-4)                          | 2.8 (1.6-6.3)         | 0.007          |
| <i>2005</i>                                                     | 4.4 (1.7-12.0)                         | 2.2 (1.4-4.0)                        | 2.7 (1.4-6.2)         | 0.02           |
| <i>2019</i>                                                     | 3.2 (1.1-12.1)                         | 2.0 (1.3-3.4)                        | 2.4 (1.2-6.1)         | 0.04           |
| <b>Annual HIV Incidence per 100,000, median (IQR)</b>           |                                        |                                      |                       |                |
| <i>1996</i>                                                     | 379 (160-988)                          | 218 (128-377)                        | 246 (145-484)         | 0.01           |
| <i>2005</i>                                                     | 237 (77-539)                           | 130 (90-209)                         | 153 (86-350)          | 0.06           |
| <i>2019</i>                                                     | 80 (26-273)                            | 59 (40-106)                          | 66 (38-172)           | 0.32           |
| <b>Annual AIDS-related Death Rate per 100,000, median (IQR)</b> |                                        |                                      |                       |                |
| <i>1996</i>                                                     | 137 (69-284)                           | 87 (45-113)                          | 94 (46-193)           | 0.01           |
| <i>2005</i>                                                     | 168 (83-546)                           | 125 (73-147)                         | 132 (74-272)          | 0.02           |
| <i>2019</i>                                                     | 47 (24-95)                             | 38 (22-79)                           | 47 (22-82)            | 0.27           |
| <b>Proportion of population receiving ART, median (IQR)</b>     |                                        |                                      |                       |                |
| <i>2005</i>                                                     | 4 (3-7)                                | 2 (1-6)                              | 3 (2-7)               | 0.09           |
| <i>2019</i>                                                     | 74 (62-82)                             | 57 (43-64)                           | 64 (46-79)            | 0.01           |
| <b>PEPFAR recipient, N (%)</b>                                  | 16 (76)                                | 8 (38)                               | 24 (57)               | 0.03           |
| <b>PEPFAR funding per capita, median (IQR)</b>                  |                                        |                                      |                       |                |
| <i>2005</i>                                                     | 0.0 (0.0-2.8)                          | 0.0 (0.0-0.7)                        | 0.0 (0.0-2.4)         | 0.57           |
| <i>2019</i>                                                     | 6.9 (0.3-9.2)                          | 0.0 (0.0-3.2)                        | 1.0 (0.0-8.2)         | 0.05           |
| <b>HIV Global Fund recipient, N (%)</b>                         | 21 (100)                               | 21 (100)                             | 42 (100)              | n/a            |
| <b>HIV Global Fund disbursements per capita, median (IQR)</b>   |                                        |                                      |                       |                |
| <i>2005</i>                                                     | 0.7 (0.2-1.6)                          | 0.7 (0.3-1.1)                        | 0.7 (0.2-1.6)         | 0.4            |
| <i>2019</i>                                                     | 1.4 (1.1-3.1)                          | 1.4 (0.8-2.0)                        | 1.4 (0.8-2.7)         | 0.13           |
| <i>World Bank Governance Indicators, 1996</i>                   |                                        |                                      |                       |                |

|                                               |                    |                    |                    |      |
|-----------------------------------------------|--------------------|--------------------|--------------------|------|
| <b>Corruption, median (IQR)</b>               | -0.7 (-1.1-0.1)    | -0.6 (-0.9 - -0.1) | -0.7 (-1.0 – 0.0)  | 0.68 |
| <b>Stability and Violence, median (IQR)</b>   | -0.4 (-0.9 - -0.1) | -0.3 (-1.2 – 0.3)  | -0.4 (-1.1 – 0.1)  | 0.75 |
| <b>Voice and Accountability, median (IQR)</b> | -0.6 (-0.9 – 0.3)  | -0.9 (-1.3 - -0.2) | -0.7 (-1.1 - -0.1) | 0.19 |
| <b>Effectiveness, median (IQR)</b>            | -0.7 (-1.0 - -0.2) | -0.7 (-1.2 - -0.2) | -0.7 (-1.1 - -0.2) | 0.34 |
| <b>Rule of Law, median (IQR)</b>              | -0.7 (-1.0 - -0.2) | -0.8 (-1.3 – 0.0)  | -0.8 (-1.3 - -0.2) | 0.56 |
| <b>Regulatory Quality, median (IQR)</b>       | -0.3 (-1.0 – 0.1)  | -0.7 (-1.3 - -0.3) | -0.5 (-1.1 - -0.2) | 0.21 |

541 **Table 2.** The relationship between cash transfer programs and individual- and country-level HIV-related outcomes.

| Outcomes                                                                 | Cash Transfer Program |             | PEPFAR Funding per capita (per \$5 increase) |            | HIV-related Global Fund Disbursements per capita (per \$5 increase) |            |
|--------------------------------------------------------------------------|-----------------------|-------------|----------------------------------------------|------------|---------------------------------------------------------------------|------------|
|                                                                          | Effect Measure        | 95% CI      | Effect Measure                               | 95% CI     | Effect Measure                                                      | 95% CI     |
| <i>Individual-level, Females</i>                                         |                       |             |                                              |            |                                                                     |            |
| Age at sexual debut among youths, coefficient <sup>1</sup>               | 0.00                  | -0.09-0.10  | 0.03                                         | -0.01-0.07 | 0.01                                                                | -0.09-0.12 |
| Sexually transmitted infection within 12 months, odds ratio <sup>1</sup> | 0.67                  | 0.50 – 0.91 | 0.98                                         | 0.80-1.19  | 0.90                                                                | 0.74-1.09  |
| Greater than 1 sexual partner within 12 months, odds ratio <sup>1</sup>  | 1.04                  | 0.75 – 1.46 | 1.17                                         | 0.89-1.54  | 0.88                                                                | 0.67-1.15  |
| HIV test within 12 months, odds ratio <sup>1</sup>                       | 2.61                  | 1.15 – 5.88 | 1.14                                         | 1.01-1.30  | 1.48                                                                | 1.18-1.84  |
| Condom use at last sex, odds ratio <sup>1</sup>                          | 0.94                  | 0.77-1.14   | 1.01                                         | 0.91-1.09  | 1.16                                                                | 0.99-1.37  |
| <i>Individual-level, Males</i>                                           |                       |             |                                              |            |                                                                     |            |
| Age at sexual debut among youths, coefficient <sup>1</sup>               | -0.14                 | -0.28-0.01  | 0.04                                         | -0.04-0.11 | -0.023                                                              | -0.16-0.12 |
| Sexually transmitted infection within 12 months, odds ratio <sup>1</sup> | 1.10                  | 0.85 – 1.43 | 1.01                                         | 0.90-1.13  | 1.02                                                                | 0.80-1.31  |
| Greater than 1 sexual partner within 12 months, odds ratio <sup>1</sup>  | 1.12                  | 0.99 – 1.28 | 1.02                                         | 0.91-1.13  | 1.00                                                                | 0.91-1.09  |
| HIV test within 12 months, odds ratio <sup>1</sup>                       | 3.19                  | 2.45 – 4.15 | 1.22                                         | 1.12-1.32  | 1.22                                                                | 1.09-1.36  |
| Condom use at last sex, odds ratio <sup>1</sup>                          | 0.88                  | 0.75 – 1.04 | 1.02                                         | 0.96-1.07  | 1.00                                                                | 0.89-1.14  |
| Transactional sex within 12 months, odds ratio <sup>1</sup>              | 0.99                  | 0.85 – 1.15 | 0.93                                         | 0.80-1.09  | 1.07                                                                | 0.88-1.31  |
| <i>Country-level</i>                                                     |                       |             |                                              |            |                                                                     |            |
| New HIV infections, incidence rate ratio <sup>2</sup>                    | 0.94                  | 0.89 – 0.99 | 1.00                                         | 0.99-1.01  | 0.99                                                                | 0.98-1.00  |
| AIDS-related deaths, incidence rate ratio <sup>2</sup>                   | 0.99                  | 0.95 – 1.03 | 0.98                                         | 0.97-0.99  | 0.99                                                                | 0.98-1.01  |
| Proportion of people with HIV receiving ART, coefficient <sup>2</sup>    | 5.0                   | -0.2 – 10.1 | 2.6                                          | 1.7-3.5    | 3.3                                                                 | 0.4-6.2    |

542 <sup>1</sup> Multivariable models include cash transfer program, age, single marital status, education, wealth quintile, rural household setting,  
543 and the country-level covariates GDP per capita, PEPFAR funding per capita, HIV-related Global Fund disbursements per capita, and  
544 three World Bank Governance Indicators: Corruption, Stability and Violence, and Voice and Accountability.

545 <sup>2</sup> Multivariable models include the country-level covariates GDP per capita, PEPFAR funding per capita, HIV-related Global Fund  
546 disbursements per capita, and three World Bank Governance Indicators: Corruption, Stability and Violence, and Voice and  
547 Accountability.

## 548 List of Figures

549 **Figure 1** - Proposed causal framework with directed acyclic graph (DAG) outlining potential relationships between large-scale cash  
550 transfer programs and HIV-related outcomes, mediated through an anti-poverty effect. The green box is the exposure of interest (cash  
551 transfer programs). The blue boxes are the HIV-related outcomes of interest, two more proximal (sex behaviors, HIV treatment  
552 cascade) and two more distal (HIV incidence, AIDS-related deaths). The orange boxes are ancestors of both the exposure and the  
553 outcomes (i.e., confounders). Underneath each box are the covariates used to measure the constructs within the boxes. Covariates from  
554 the DHS are individual-level, and all other covariates are country-level.

555 **Figure 2** – Timeline of included countries, with the green line indicating the cash transfer period, and the colored dots indicating years  
556 during which a Demographic and Health Survey (DHS) was conducted.

557 **Figure 3** – Adjusted incidence rate ratios of new HIV infections and AIDS-related deaths, and adjusted change in the proportion of  
558 proportion of people with HIV receiving antiretroviral therapy, as a function of year of the cash transfer period.

559 **Figure 4** – Interaction analysis of baseline HIV prevalence at the start of the cash transfer period (above or below the median, 3.7%)  
560 and impoverished population coverage of the cash transfer program(s) (above or below the median, 23%) for individual- (stratified by  
561 sex) and country-level outcomes, with adjusted odds ratios for individual-level outcomes and adjusted incidence rate ratios for  
562 country-level outcomes, and p-values for interaction.

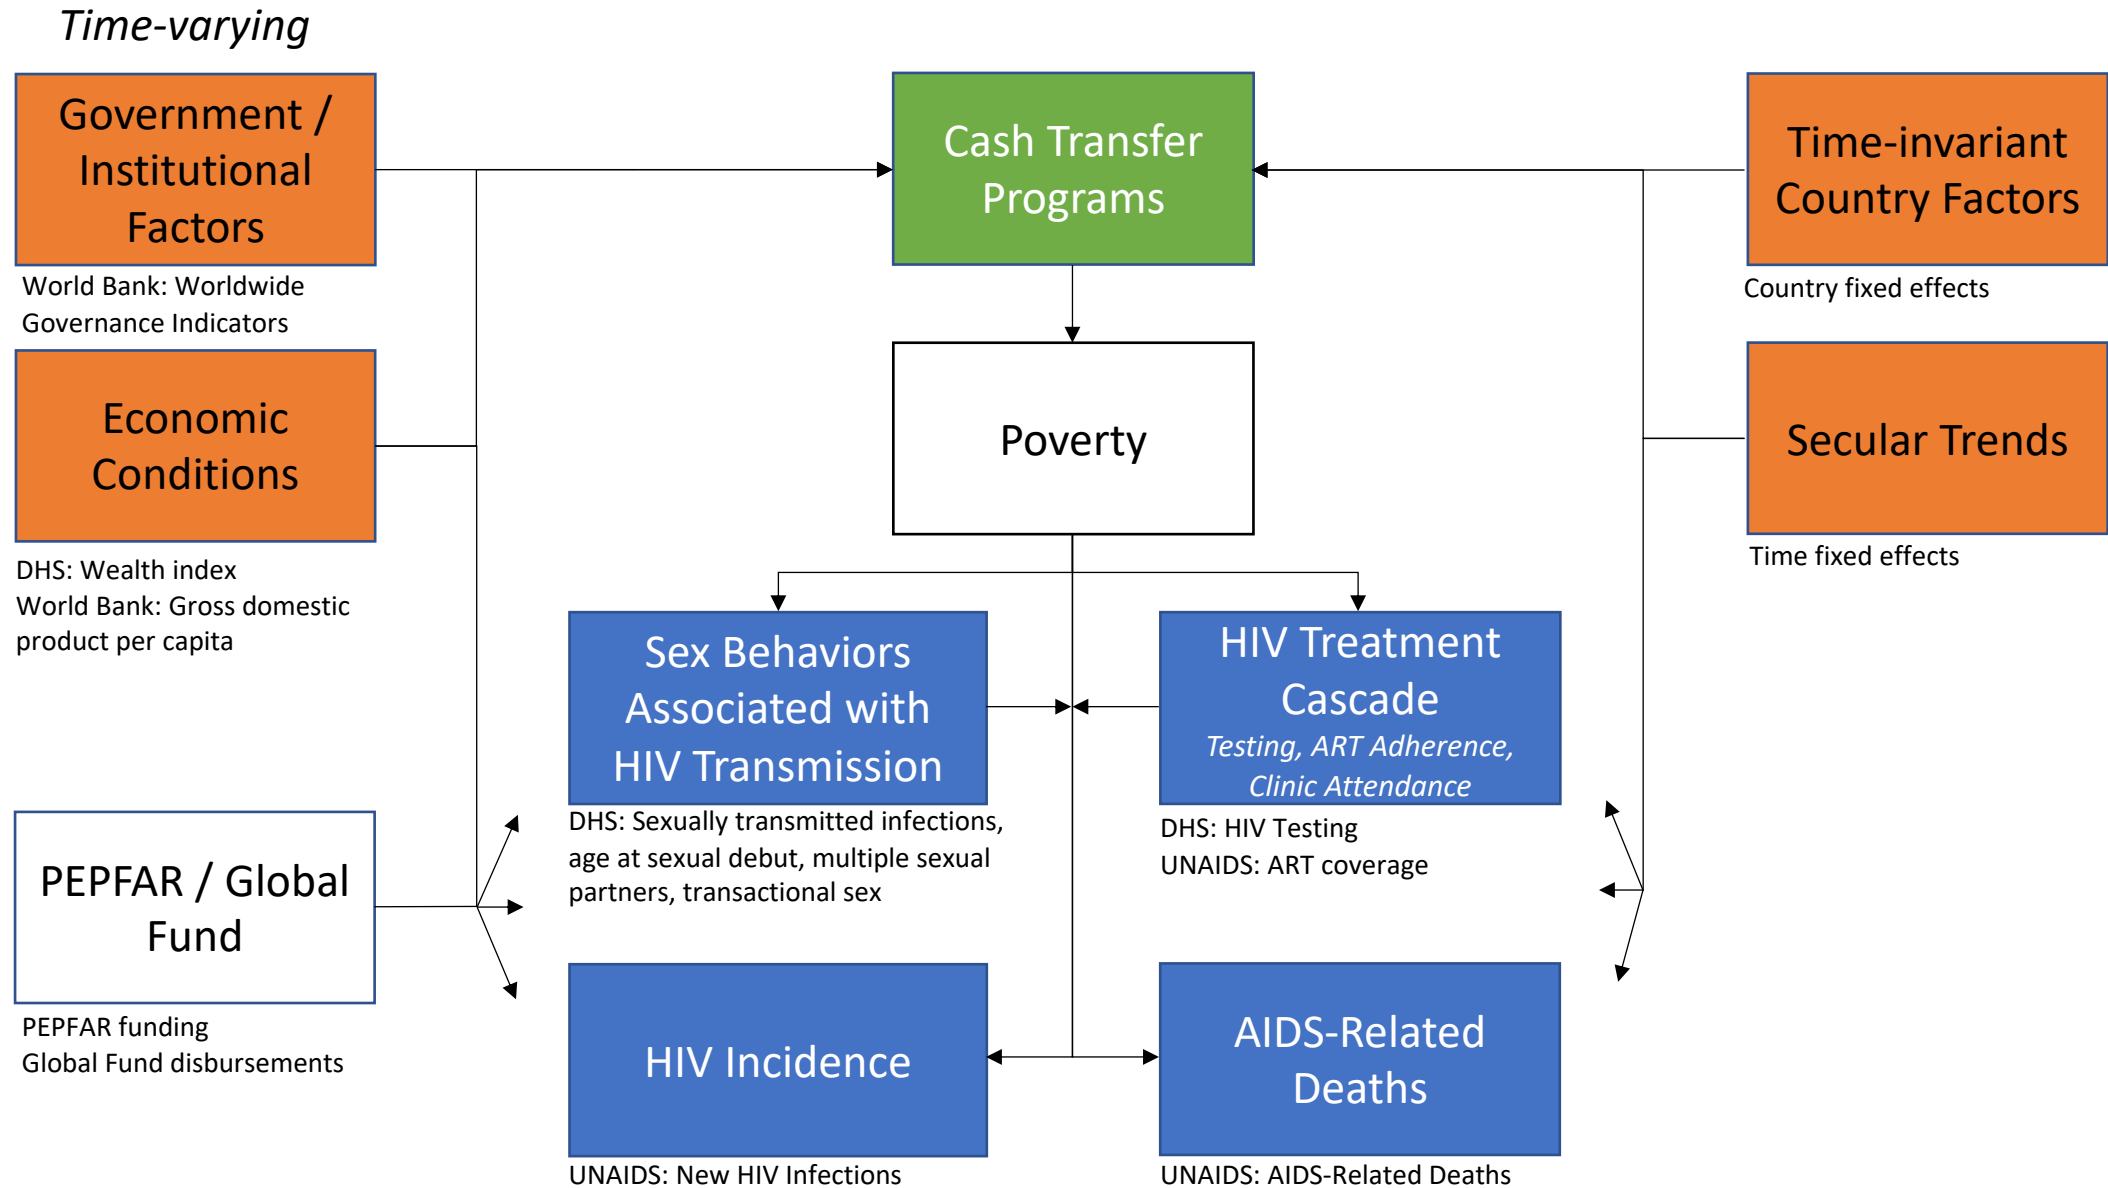

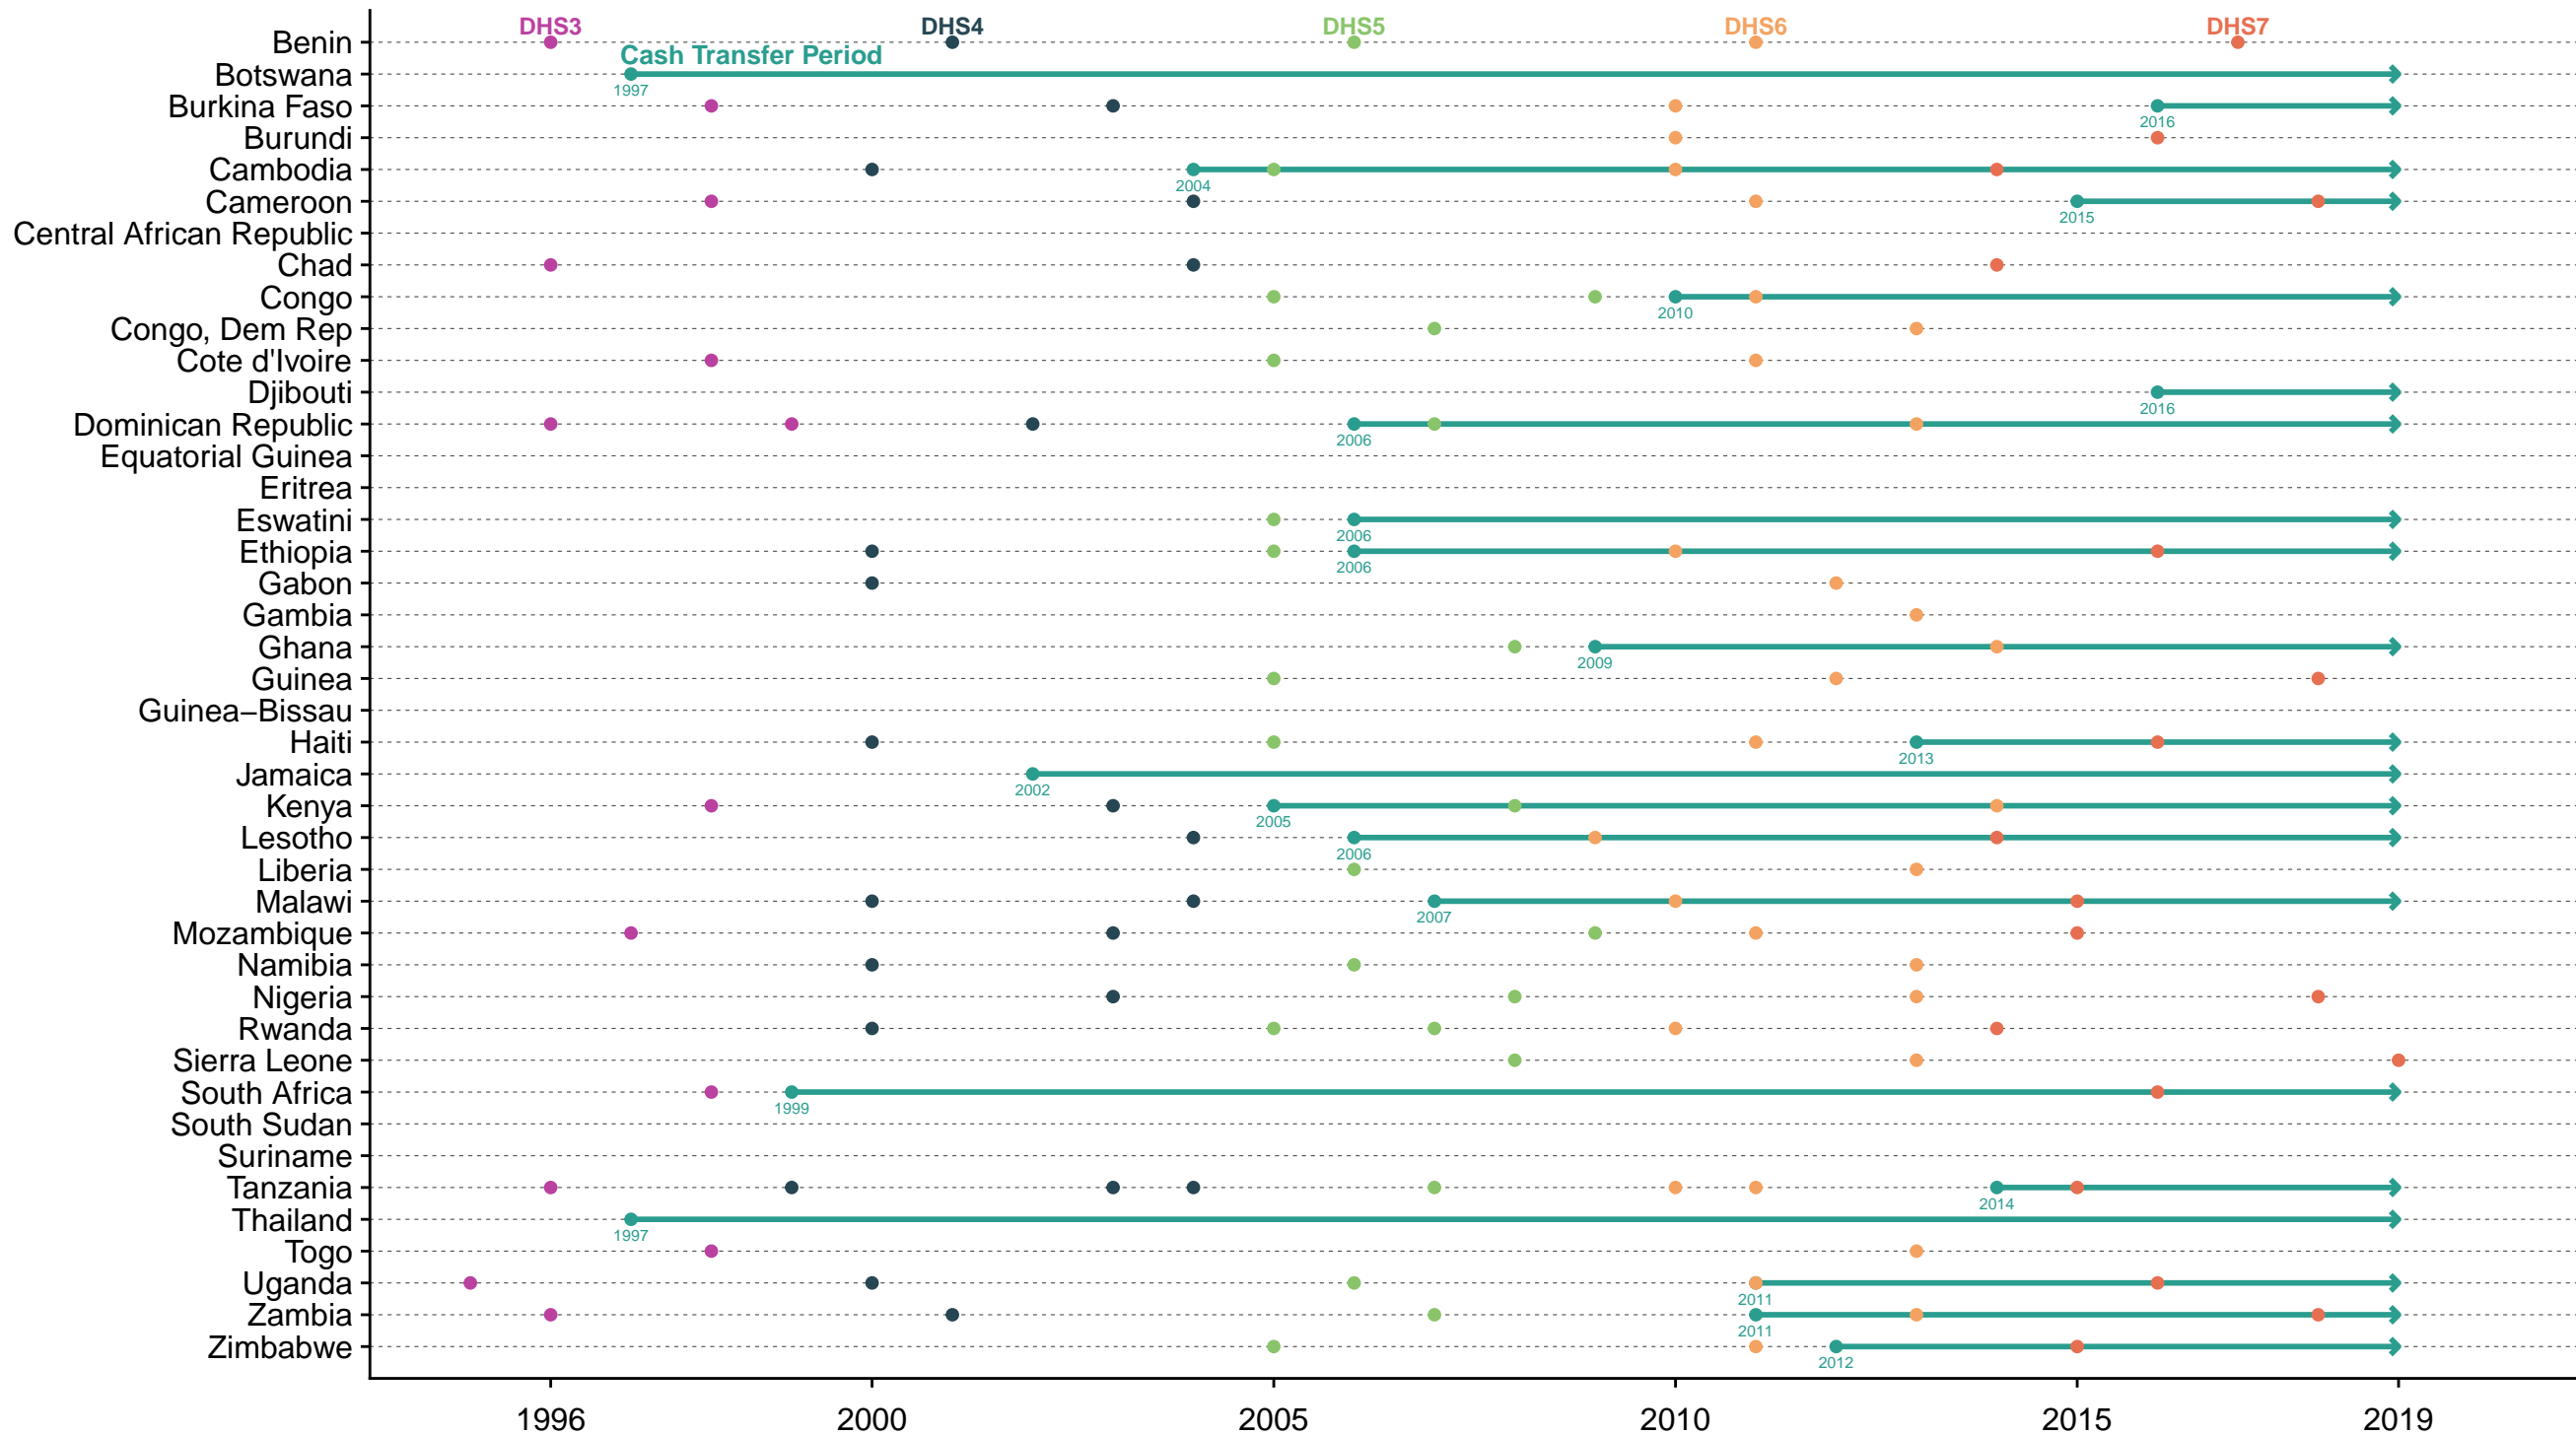

New HIV Infections

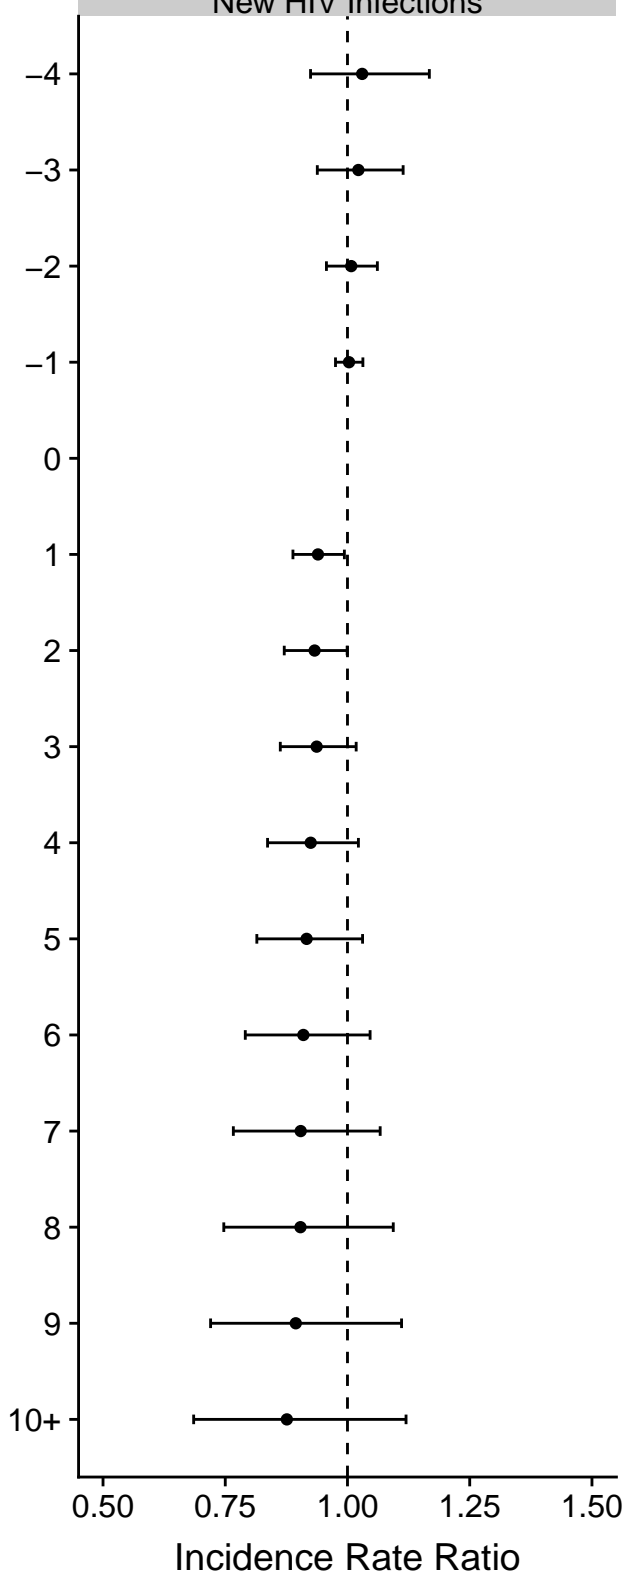

AIDS-Related Deaths

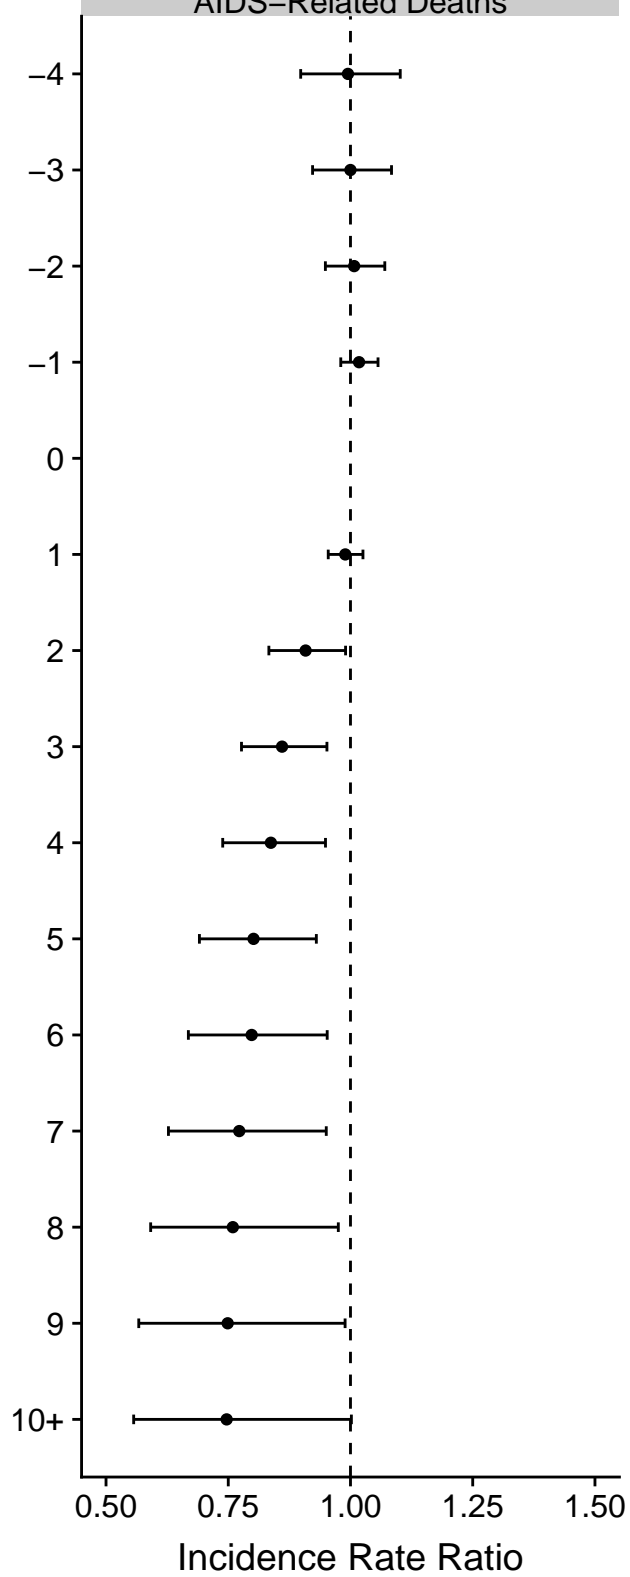

ART Coverage

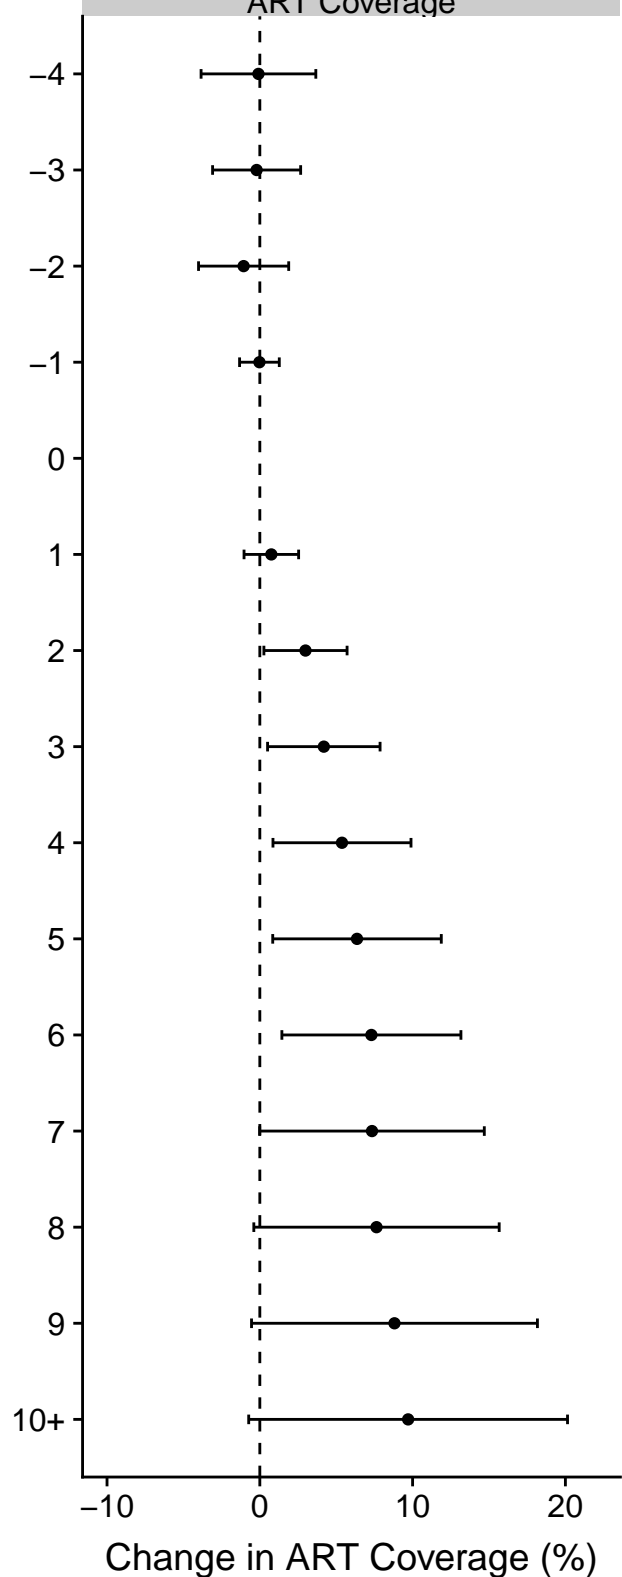



Females

It is made available under a [CC-BY-NC-ND 4.0 International license](#).

P for interaction

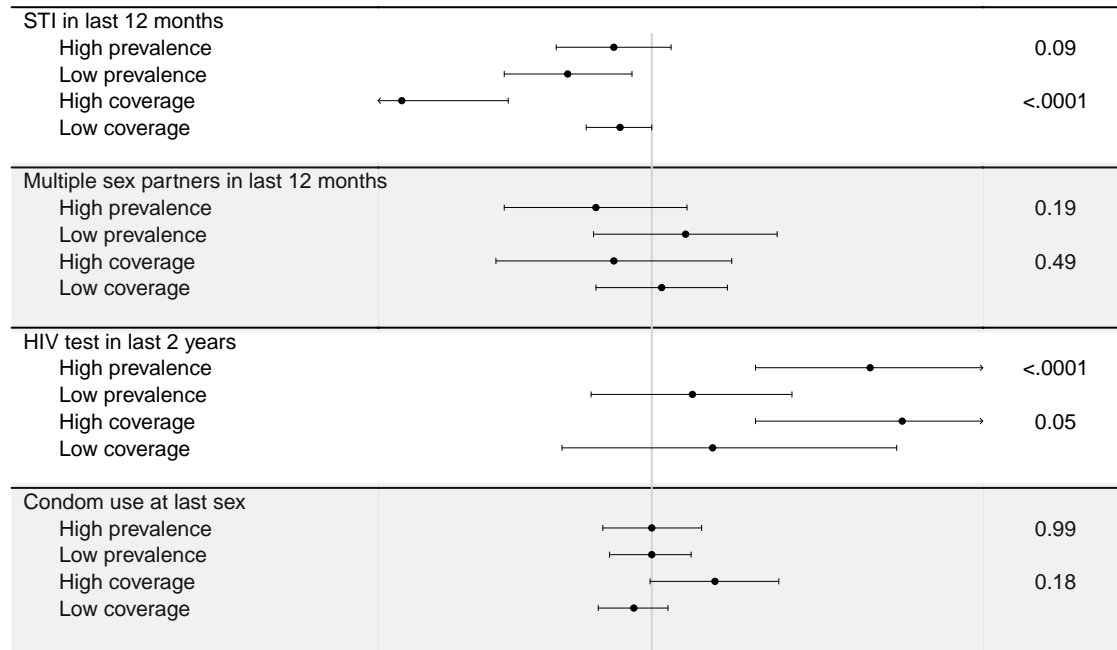

Males

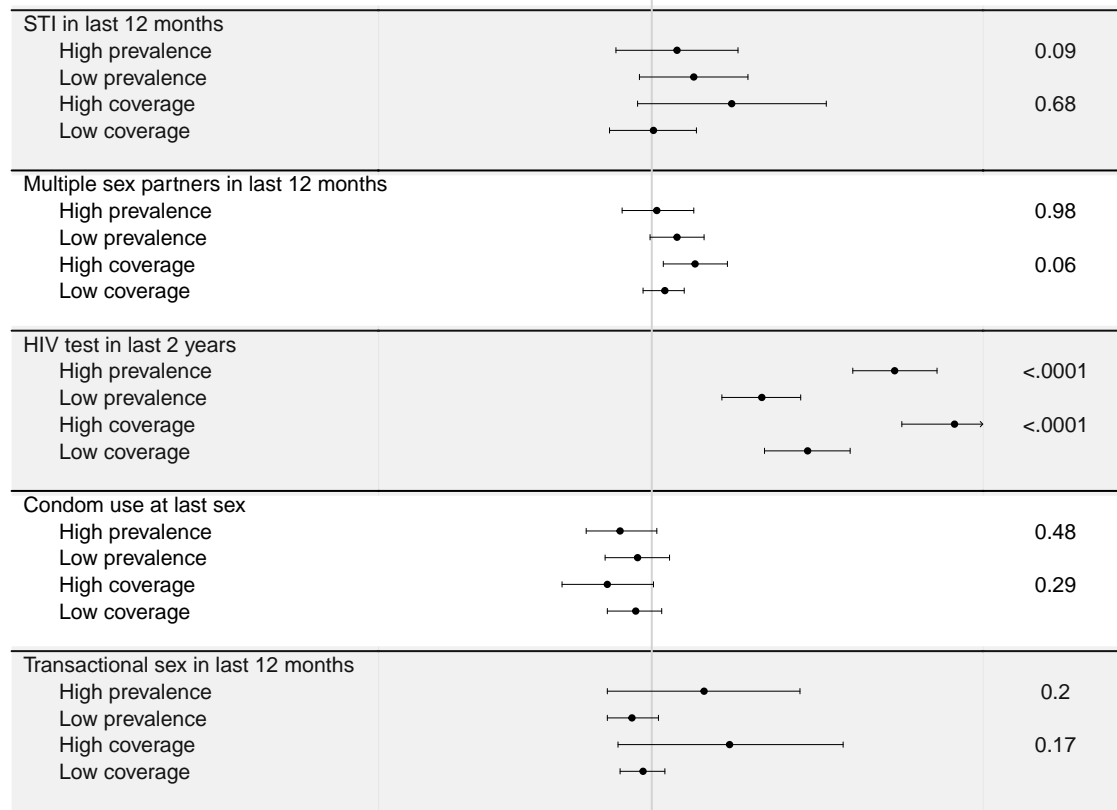

Country-level

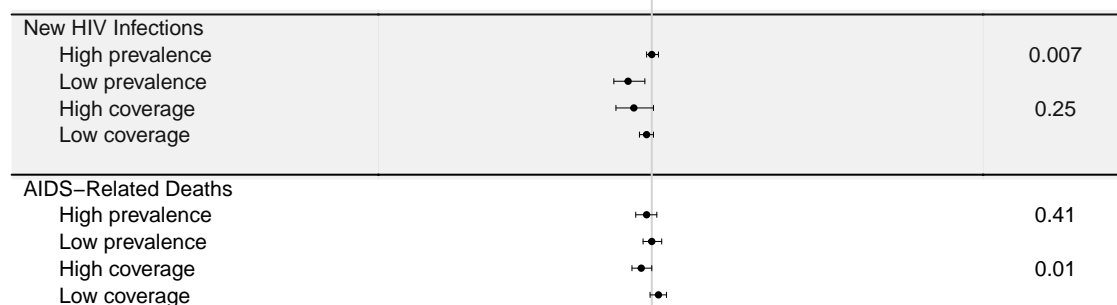

0.20 0.50 1.0 2.0 7.0
